# Supplementary material for: Education and employment status of adults with autism spectrum disorders in Germany – a cross-sectional-survey
Source: PubMed Central journal article supplement (PMC5870494; doi:10.1186/s12888-018-1645-7), 2018-03-27
Supplement: 12888_2018_1645_MOESM1_ESM.pdf [file 12888_2018_1645_MOESM1_ESM.pdf]

# **Menschen mit Autismus-Spektrum-Störungen und der Arbeitsmarkt**

**Bitte senden Sie den vollständig ausgefüllten Fragebogen mit beiliegendem frankiertem Rückumschlag an:**

Universitätsklinikum Freiburg  
Klinik für Psychiatrie und Psychotherapie  
Arbeitsgruppe Psychotherapie- und Versorgungsforschung  
z. Hd. Herrn Dr. phil. Lars P. Hölzel  
Hauptstraße 5, 79104 Freiburg

**Bei Fragen oder Rückmeldungen wenden Sie sich bitte an:**

Universitätsklinikum Freiburg  
Klinik für Psychiatrie und Psychotherapie  
Sektion Psychotherapieforschung in der Psychiatrie  
Herrn Dr. phil. Thomas Fangmeier  
Tel.: +49 (0)761/270-69680  
E-Mail: [thomas.fangmeier@uniklinik-freiburg.de](mailto:thomas.fangmeier@uniklinik-freiburg.de)

Liebe Teilnehmerin, lieber Teilnehmer,

im Folgenden finden Sie einige Hinweise und Erläuterungen zum Ausfüllen des Fragebogens. Bitte lesen Sie zuerst die Erklärungen zum Ausfüllen auf dieser Seite aufmerksam durch, bevor Sie mit dem Beantworten der Fragen beginnen. Die Arbeitszeit, die Sie zum Ausfüllen des Fragebogens benötigen, beträgt ca. 45-60 Minuten. Der Fragebogen kann auch in Etappen ausgefüllt werden.

Bitte füllen Sie den Fragebogen komplett aus.

Kreuzen Sie bei jeder Frage die Antwort an, die am ehesten auf Sie zutrifft.

Um eine Antwort zu markieren, setzen Sie bitte ein Kreuz in das Kästchen, welches am ehesten Ihrer Antwort entspricht, z. B.:

| überhaupt nicht          | an einzelnen Tagen       | an mehr als der Hälfte der Tage     | beinahe jeden Tag        |
|--------------------------|--------------------------|-------------------------------------|--------------------------|
| <input type="checkbox"/> | <input type="checkbox"/> | <input checked="" type="checkbox"/> | <input type="checkbox"/> |

Falls die aufgeführten Antworten Ihre Meinung nicht genau treffen, kreuzen Sie bitte die Antwort an, die am ehesten auf Sie zutrifft.

Wenn nicht anders vermerkt, ist **jeweils nur 1 Kästchen** als Antwort anzukreuzen. Andernfalls wird extra darauf hingewiesen, z.B. durch den Hinweis: **(Mehrfachantworten möglich)**. Fragen, bei denen mehrere Antworten angekreuzt werden können, erkennen Sie zudem daran, dass statt eines Kästchens ein Kreis zum Ankreuzen vor den möglichen Antworten steht.

Falls Sie versehentlich ein falsches Kreuz gemacht haben, streichen Sie das Kästchen bitte durch und kreuzen Sie die für Sie richtige Antwort an, z.B.:

| überhaupt nicht                     | an einzelnen Tagen                  | an mehr als der Hälfte der Tage | beinahe jeden Tag        |
|-------------------------------------|-------------------------------------|---------------------------------|--------------------------|
| <input checked="" type="checkbox"/> | <input checked="" type="checkbox"/> | <input type="checkbox"/>        | <input type="checkbox"/> |

Wenn keine Fragen mehr bestehen, können Sie nun auf der nächsten Seite mit der Beantwortung des Fragebogens beginnen. Wenn Sie noch Fragen haben, wenden Sie sich bitte an Herrn Dr. phil. Thomas Fangmeier (Kontaktdaten auf dem Deckblatt).

## A: Schulischer und beruflicher Werdegang

Zunächst möchten wir Sie bitten, einige Fragen zu Ihrem **schulischen** und Ihrem **beruflichen Werdegang** zu beantworten.

A1. Welchen höchsten allgemeinbildenden **Schulabschluss** haben Sie?

(Kreuzen Sie nur das Kästchen für die Antwort an, die am ehesten auf Sie zutrifft.)

(DEGS D-123)

- |                                                                                               |                                                                               |
|-----------------------------------------------------------------------------------------------|-------------------------------------------------------------------------------|
| <input type="checkbox"/> Haupt- oder Volksschulabschluss                                      | <input type="checkbox"/> Abitur, allgemeine oder fachgebundene Hochschulreife |
| <input type="checkbox"/> Realschulabschluss / Mittlere Reife / Fachschulreife                 | <input type="checkbox"/> Anderen Schulabschluss (z.B. im Ausland erworben)    |
| <input type="checkbox"/> POS (Polytechnische Oberschule) bzw. 10. Klasse (vor 1965: 8.Klasse) | <input type="checkbox"/> Schule beendet ohne Schulabschluss                   |
| <input type="checkbox"/> Fachhochschulreife / Abschluss einer Fachoberschule                  | <input type="checkbox"/> Noch keinen Schulabschluss                           |

A2. Machen Sie zurzeit eine **Schulausbildung**?

(Kreuzen Sie nur das Kästchen für die Antwort an, die am ehesten auf Sie zutrifft.)

(DEGS D-124)

- |                                                                  |                                                                               |
|------------------------------------------------------------------|-------------------------------------------------------------------------------|
| <input type="checkbox"/> Nein ➤ <b>Bitte weiter mit Frage A3</b> | <input type="checkbox"/> Ja, und ich strebe folgenden Schulabschluss an:      |
|                                                                  | <input type="checkbox"/> Hauptschulabschluss                                  |
|                                                                  | <input type="checkbox"/> Realschulabschluss / Mittlere Reife / Fachschulreife |
|                                                                  | <input type="checkbox"/> Fachhochschulreife / Abschluss einer Fachoberschule  |
|                                                                  | <input type="checkbox"/> Abitur, allgemeine oder fachgebundene Hochschulreife |
|                                                                  | <input type="checkbox"/> Anderen Schulabschluss                               |

A3. Welchen höchsten beruflichen **Ausbildungsabschluss bzw. Hochschulabschluss** haben Sie?

(Kreuzen Sie nur das Kästchen für die Antwort an, die am ehesten auf Sie zutrifft.)

(DEGS D-125)

- |                                                                                                                                                                                       |                                                                                           |
|---------------------------------------------------------------------------------------------------------------------------------------------------------------------------------------|-------------------------------------------------------------------------------------------|
| <input type="checkbox"/> Noch in beruflicher Ausbildung (Auszubildende/r, Studentin/Student, Berufsvorbereitungsjahr)                                                                 | <input type="checkbox"/> Anderen Ausbildungsabschluss                                     |
| <input type="checkbox"/> Keinen Berufsschulabschluss und nicht in beruflicher Ausbildung                                                                                              | <input type="checkbox"/> Bachelor an (Fach-) Hochschule abgeschlossen                     |
| <input type="checkbox"/> Ausbildung an einer Fachschule, Meister-, Technikerschule, Berufs- oder Fachakademie abgeschlossen                                                           | <input type="checkbox"/> Sonstigen Abschluss an einer Fachhochschule oder Ingenieurschule |
| <input type="checkbox"/> Beruflich-betriebliche Ausbildung (Lehre) abgeschlossen                                                                                                      | <input type="checkbox"/> Sonstigen Abschluss an einer Universität oder Hochschule         |
| <input type="checkbox"/> Beruflich-schulische Ausbildung abgeschlossen (Berufsfachschule, Handelsschule, Vorbereitungsdienst für den Mittleren Dienst in der öffentlichen Verwaltung) |                                                                                           |

A4. Machen Sie zurzeit eine **berufliche Ausbildung oder ein Studium**?

(Kreuzen Sie nur das Kästchen für die Antwort an, die am ehesten auf Sie zutrifft.) (angelehnt an DEGS D-126)

- Nein ➤ **Bitte weiter mit Abschnitt B**
- Ja, es handelt sich um folgende Art der Ausbildung:
- Beruflich-betriebliche Ausbildung (Lehre)
  - Beruflich-schulische Ausbildung (z.B. Ausbildung an Berufsfachschule, Handelsschule, Vorbereitungsdienst für den Mittleren Dienst in der öffentlichen Verwaltung)
  - Besuch einer Fachschule, Meister-, Technikerschule, Berufs- oder Fachakademie
  - Hochschul- oder Fachhochschulstudium
  - Andere Ausbildung
  - Berufsvorbereitende Maßnahmen

**B: Berufstätigkeit und Arbeitslosigkeit**

Im folgenden Fragenblock werden nähere Angaben zu Zeiten der **Berufstätigkeit** und **Arbeitslosigkeit** erfragt.

B1. Waren Sie jemals **berufstätig**? Hierzu zählen sowohl Tätigkeiten im Angestelltenverhältnis als auch selbständige Tätigkeiten.

(Kreuzen Sie nur das Kästchen für die Antwort an, die am ehesten auf Sie zutrifft.)

- Nein ➤ **Bitte weiter mit Abschnitt H**
- Ja

B2. Sind Sie zurzeit **berufstätig**?

(Kreuzen Sie nur das Kästchen für die Antwort an, die am ehesten auf Sie zutrifft.)

- Nein ➤ **Bitte weiter mit Frage B5**
- Ja ➤ In welchem zeitlichen Umfang?  
(Mehrfachantworten möglich.)
- Vollzeit
  - Teilzeit, und zwar \_\_\_\_\_ %
  - Geringfügig (450-Euro- oder Minijob)
  - „Ein-Euro-Job“ (Bezug von ALG II)
  - Gelegentlich oder unregelmäßig beschäftigt
  - Berufliche Ausbildung / Lehre mit Ausbildungsvergütung
  - Vorübergehend freigestellt / beurlaubt  
➤ **Bitte weiter mit Frage B5**

B3. Sind Sie zur Zeit in einer Werkstatt für Menschen mit Behinderung (WfbM) tätig?

(Kreuzen Sie nur das Kästchen für die Antwort an, die am ehesten auf Sie zutrifft.)

- Ja  Nein

B4. Wie viele Stunden arbeiten Sie normalerweise pro Woche?

(Bitte tragen Sie die Anzahl der Stunden auf dem dafür vorgesehenen Strich ein.)

(DEGS D-128)

\_\_\_\_\_ Arbeitsstunden pro Woche

B5. Trifft eine der folgenden Angaben auf Ihre derzeitige berufliche Situation zu?

(Hier können mehrere Antworten angekreuzt werden.)

(angelehnt an DEGS D-131)

- |                                                                                      |                                                                                                      |
|--------------------------------------------------------------------------------------|------------------------------------------------------------------------------------------------------|
| <input type="radio"/> Altersteilzeit (unabhängig davon, in welcher Phase befindlich) | <input type="radio"/> Wehr- oder Bundesfreiwilligendienst, Freiwilliges Soziales / Ökologisches Jahr |
| <input type="radio"/> In Rente / Pension                                             | <input type="radio"/> Hausfrau/-mann                                                                 |
| <input type="radio"/> Umschulung                                                     | <input type="radio"/> Arbeitslos                                                                     |
| <input type="radio"/> Praktikum / Volontariat                                        | <input type="radio"/> Elternzeit                                                                     |
| <input type="radio"/> Nichts davon trifft zu                                         |                                                                                                      |

B6. Wie viele Monate waren Sie insgesamt in den letzten 5 Jahren **arbeitslos**?

(Bitte tragen Sie die Anzahl der Monate auf dem dafür vorgesehenen Strich ein.)

(DEGS D-134)

Insgesamt \_\_\_\_\_ Monate arbeitslos

B7. Sind Sie in **Rente** bzw. pensioniert?

(Kreuzen Sie nur das Kästchen für die Antwort an, die am ehesten auf Sie zutrifft.)

(DEGS D-136)

- |                                                                                                                                                 |                                       |
|-------------------------------------------------------------------------------------------------------------------------------------------------|---------------------------------------|
| <input type="checkbox"/> Nein                                                                                                                   | ➤ <b>Bitte weiter mit Frage B9</b>    |
| <input type="checkbox"/> Altershalber in Rente / pensioniert                                                                                    | ➤ <b>Bitte weiter mit Abschnitt H</b> |
| <input type="checkbox"/> Vorzeitig in Rente / pensioniert ( <b>nicht aus gesundheitlichen Gründen</b> , sondern z.B. Modell der Altersteilzeit) | ➤ <b>Bitte weiter mit Frage B8</b>    |
| <input type="checkbox"/> Aktuell <b>aus gesundheitlichen Gründen</b> in Rente / pensioniert                                                     | ➤ <b>Bitte weiter mit Frage B8</b>    |

B8. Seit wann sind Sie **vorzeitig berentet**?

(Bitte geben Sie Monat und Jahr an der gekennzeichneten Stelle an.)

(DEGS D-137)

\_\_\_ / \_\_\_\_\_

**B9. Beziehen Sie eine gesetzliche...?**

*(Kreuzen Sie nur das Kästchen an, das am ehesten für Sie passt.)*

*(angelehnt an DEGS D-138)*

- |                                                                          |                                                                                      |
|--------------------------------------------------------------------------|--------------------------------------------------------------------------------------|
| <input type="checkbox"/> Berufsunfähigkeitsrente<br>(bis Dezember 2000)  | <input type="checkbox"/> Rente wegen teilweiser Erwerbsminderung<br>(ab Januar 2001) |
| <input type="checkbox"/> Erwerbsunfähigkeitsrente<br>(bis Dezember 2000) | <input type="checkbox"/> Rente wegen voller Erwerbsminderung<br>(ab Januar 2001)     |
| <input type="checkbox"/> Ich beziehe keine der genannten Renten.         |                                                                                      |

**C. Berufliche Tätigkeit**

Die folgenden Fragen beziehen sich auf die **Art Ihrer beruflichen Tätigkeit**. Bitte antworten Sie stichwortartig und formulieren Sie so präzise wie möglich.

**C1. Welche berufliche Tätigkeit haben Sie in Ihrem bisherigen Arbeitsleben am längsten ausgeübt?**

Bitte benennen Sie Ihre **berufliche Tätigkeit**. Geben Sie bitte die **genaue Bezeichnung** beziehungsweise den **Fachbereich** an und benennen **auch den Wirtschaftszweig**, also z.B.:

- Berufliche Tätigkeit: Ärztin / Arzt; Fachbereich: Onkologie; Wirtschaftszweig: Gesundheitswesen
- Berufliche Tätigkeit: Fachinformatikerin / Fachinformatiker; Fachbereich: Anwendungsentwicklung; Wirtschaftszweig: Software-Branche

*(Bitte tragen Sie Ihre Antwort in den Kasten ein.)*

| Berufliche Tätigkeit: | Fachbereich: | Wirtschaftszweig: |
|-----------------------|--------------|-------------------|
|                       |              |                   |

**C2. Welche berufliche Tätigkeit üben Sie derzeit hauptsächlich aus?**

Bitte benennen Sie Ihre **berufliche Tätigkeit**. Geben Sie bitte die **genaue Bezeichnung** beziehungsweise den **Fachbereich** an und benennen **auch den Wirtschaftszweig**, also z.B.:

- Berufliche Tätigkeit: Ärztin / Arzt; Fachbereich: Onkologie; Wirtschaftszweig: Gesundheitswesen
- Berufliche Tätigkeit: Fachinformatikerin / Fachinformatiker; Fachbereich: Anwendungsentwicklung; Wirtschaftszweig: Software-Branche

*(Bitte tragen Sie Ihre Antwort in den Kasten ein.)*

| Berufliche Tätigkeit: | Fachbereich: | Wirtschaftszweig: |
|-----------------------|--------------|-------------------|
|                       |              |                   |

**D: Arbeitszufriedenheit**

Die folgenden Fragen beziehen sich darauf, ob Sie mit Ihrem aktuellen oder Ihrem letzten Arbeitsplatz **zufrieden** sind bzw. waren.

- Bitte setzen Sie hier ein Kreuz, wenn Sie aktuell keinen Arbeitsplatz haben und sich Ihre nachfolgenden Angaben in Frage D1 und D2 auf Ihren letzten Arbeitsplatz beziehen.

**D1. Wie zufrieden sind bzw. waren Sie mit dieser Tätigkeit?**

*(Kreuzen Sie nur das Kästchen für die Antwort an, die am ehesten auf Sie zutrifft.)*

| Sehr zufrieden           | Eher zufrieden           | Eher unzufrieden         | Überhaupt nicht zufrieden |
|--------------------------|--------------------------|--------------------------|---------------------------|
| <input type="checkbox"/> | <input type="checkbox"/> | <input type="checkbox"/> | <input type="checkbox"/>  |

**D2. Bitte wählen Sie aus den untenstehenden Arbeitsbedingungen beziehungsweise Aspekten Ihres Arbeitsplatzes diejenigen aus, mit welchen Sie unzufrieden sind bzw. waren.**

*(Hier können mehrere Antworten angekreuzt werden.)*

- |                                                                                                                                                           |                                                                                                                                                                                   |
|-----------------------------------------------------------------------------------------------------------------------------------------------------------|-----------------------------------------------------------------------------------------------------------------------------------------------------------------------------------|
| <input type="radio"/> Art der Tätigkeit                                                                                                                   | <input type="radio"/> Zu langer Arbeitsweg                                                                                                                                        |
| <input type="radio"/> Kommunikationsschwierigkeiten mit der vorgesetzten Person oder Kolleginnen / Kollegen                                               | <input type="radio"/> Keine ausreichende Einarbeitungsphase zu Beginn des Arbeitsverhältnisses                                                                                    |
| <input type="radio"/> Kein eigenes Büro                                                                                                                   | <input type="radio"/> Zu geringes Gehalt                                                                                                                                          |
| <input type="radio"/> Zu wenig Unterstützung bei inhaltlichen Fragen                                                                                      | <input type="radio"/> Zu niedrige eigene hierarchische Stellung                                                                                                                   |
| <input type="radio"/> Zu wenig Rückmeldung in Bezug auf geleistete Arbeit                                                                                 | <input type="radio"/> Zu geringe Wertschätzung und Respekt der eigenen Person                                                                                                     |
| <input type="radio"/> Zu wenig Unterstützung bei der Kommunikation mit anderen Menschen, z.B. Durchführung von Telefonaten nur dann, wenn unbedingt nötig | <input type="radio"/> Zu viel direkter Kontakt zu externen Personen, z.B. Klientinnen- / Klienten-Kontakt, Käuferinnen- / Käufer-Kontakt oder Verkäuferinnen- / Verkäufer-Kontakt |
| <input type="radio"/> Zu viel äußere Reize, z.B. Geräusche oder helle, flackernde Lichtquellen                                                            | <input type="radio"/> Zu wenig Flexibilität bei den Arbeitszeiten                                                                                                                 |
| <input type="radio"/> Zu viel direkter Kontakt zu Kolleginnen / Kollegen                                                                                  | <input type="radio"/> Sonstiges:                                                                                                                                                  |
| <input type="radio"/> Unklare Vorgaben über die zu leistende Arbeit                                                                                       |                                                                                                                                                                                   |

*(Bitte tragen Sie Ihre Antwort in den Kasten ein.)*

**E: Schwierigkeiten am Arbeitsplatz**

Es kann sein, dass es manchmal zu **Schwierigkeiten bei der Arbeit** kommt, die z.B. zu Konflikten im Team bis hin zu einem Verlust des Arbeitsplatzes führen können. Die Fragen in diesem Abschnitt beziehen sich auf Ihre Erfahrungen.

- E1. Sind Sie in den letzten 12 Monaten, in denen Sie gearbeitet haben, durch eine/n Kollegin / Kollegen / Vorgesetzte/n am Arbeitsplatz **abgewertet worden** (z.B. bezüglich Ihres Aussehens, Ihrer Art sich zu kleiden, Ihrer Denk-, Handlungs- oder Arbeitsweise oder möglicher Behinderungen)? Oder wurden Sie beleidigt, beschimpft, bedroht, schikaniert oder unter Druck gesetzt?

*(Kreuzen Sie nur das Kästchen für die Antwort an, die am ehesten auf Sie zutrifft.)*

(angelehnt an DEGS D-24)

- Nein ➤ **Bitte weiter mit Frage E2**
- Ja ➤ Wie stark fühlten oder fühlen Sie sich dadurch in Ihrem Befinden beeinträchtigt?
- Gar nicht
  - Kaum
  - Etwas
  - Stark
  - Sehr stark

- E2. Haben Sie in der Vergangenheit schon mal einen **Arbeitsplatz verloren**?

*(Kreuzen Sie nur das Kästchen für die Antwort an, die am ehesten auf Sie zutrifft.)*

- Nein ➤ **Bitte weiter mit E3**
- Ja ➤ Welche Gründe gab es dafür?

*(Bitte tragen Sie diese stichpunktartig in den untenstehenden Kasten ein.)*

- E3. Welche **autismusspezifischen Verhaltensweisen** gibt es, die Ihrer Meinung nach bei Ihnen Ihre **Arbeit negativ beeinflussen** können?

*(Bitte tragen Sie diese stichpunktartig in den Kasten ein.)*



## F: Unterstützungsbedarf in der Bewerbungsphase und bei der Arbeit

In diesem Abschnitt wird danach gefragt, in welchen **Phasen des Prozesses der Arbeitssuche bis hin zur Situation am Arbeitsplatz** Sie **Unterstützung** benötigen. Dabei beziehen sich die Antworten nicht darauf, durch wen oder was Sie Unterstützung in Anspruch nehmen könnten, sondern darauf, **in welchem Bereich** Sie überhaupt **Unterstützungsbedarf** sehen.

Es wird zwischen vier zeitlichen Phasen unterschieden: Der erste Teil bezieht sich dabei auf die **Phase der Berufsorientierung**, der zweite Teil auf die **Phase der Bewerbung**. Der dritte Teil thematisiert den Unterstützungsbedarf bei der **Vorbereitung auf ein Bewerbungsgespräch** und der vierte Teil den Unterstützungsbedarf **am Arbeitsplatz**.

### F1. Unterstützungsbedarf in der Phase der Berufsorientierung

(Kreuzen Sie nur das Kästchen für die Antwort an, die am ehesten auf Sie zutrifft.)

Keine Unterstützung

Etwas Unterstützung

Viel Unterstützung

Sehr viel Unterstützung

- |    |                                                                 |                          |                          |                          |                          |
|----|-----------------------------------------------------------------|--------------------------|--------------------------|--------------------------|--------------------------|
| 1. | Bei der Identifikation der eigenen Fähigkeiten                  | <input type="checkbox"/> | <input type="checkbox"/> | <input type="checkbox"/> | <input type="checkbox"/> |
| 2. | Bei der Identifikation von passenden Berufsbildern              | <input type="checkbox"/> | <input type="checkbox"/> | <input type="checkbox"/> | <input type="checkbox"/> |
| 3. | Bei der Organisation von Hilfsangeboten für die Bewerbungsphase | <input type="checkbox"/> | <input type="checkbox"/> | <input type="checkbox"/> | <input type="checkbox"/> |

### F2. Unterstützungsbedarf in der Phase der Bewerbung

(Kreuzen Sie nur das Kästchen für die Antwort an, die am ehesten auf Sie zutrifft.)

Keine Unterstützung

Etwas Unterstützung

Viel Unterstützung

Sehr viel Unterstützung

- |    |                                                                                |                          |                          |                          |                          |
|----|--------------------------------------------------------------------------------|--------------------------|--------------------------|--------------------------|--------------------------|
| 1. | Bei der Suche nach geeigneten Stellenanzeigen                                  | <input type="checkbox"/> | <input type="checkbox"/> | <input type="checkbox"/> | <input type="checkbox"/> |
| 2. | Beim Verfassen von Bewerbungen                                                 | <input type="checkbox"/> | <input type="checkbox"/> | <input type="checkbox"/> | <input type="checkbox"/> |
| 3. | Beim Umgang mit der Diagnose Autismus-Spektrum-Störung im Rahmen der Bewerbung | <input type="checkbox"/> | <input type="checkbox"/> | <input type="checkbox"/> | <input type="checkbox"/> |

### F3. Unterstützungsbedarf bei der Vorbereitung auf ein Bewerbungsgespräch

(Kreuzen Sie nur das Kästchen für die Antwort an, die am ehesten auf Sie zutrifft.)

Keine Unterstützung

Etwas Unterstützung

Viel Unterstützung

Sehr viel Unterstützung

- |    |                                                                                                                          |                          |                          |                          |                          |
|----|--------------------------------------------------------------------------------------------------------------------------|--------------------------|--------------------------|--------------------------|--------------------------|
| 1. | Bei der Zusammenstellung geeigneter Kleidung und z.B. der Auswahl einer angemessenen Frisur für das Bewerbungsgespräch   | <input type="checkbox"/> | <input type="checkbox"/> | <input type="checkbox"/> | <input type="checkbox"/> |
| 2. | Bei der inhaltlichen Vorbereitung auf ein Bewerbungsgespräch, z.B. der Überlegung, welche Fragen gestellt werden könnten | <input type="checkbox"/> | <input type="checkbox"/> | <input type="checkbox"/> | <input type="checkbox"/> |

| <i>(Kreuzen Sie nur das Kästchen für die Antwort an, die am ehesten auf Sie zutrifft.)</i> |                                                                                                                                                                                                                                                                                 | Keine Unterstützung      | Etwas Unterstützung      | Viel Unterstützung       | Sehr viel Unterstützung  |
|--------------------------------------------------------------------------------------------|---------------------------------------------------------------------------------------------------------------------------------------------------------------------------------------------------------------------------------------------------------------------------------|--------------------------|--------------------------|--------------------------|--------------------------|
| 3.                                                                                         | Bei dem Training von möglichen Gesprächssituationen innerhalb des Bewerbungsgesprächs<br>Z. B.: Wie setze ich meine Stimme gewinnbringend ein? Wie funktioniert ein „normaler“ Blickkontakt? Wie beachte ich alle anwesenden Personen? Wie erkenne ich geltende soziale Regeln? | <input type="checkbox"/> | <input type="checkbox"/> | <input type="checkbox"/> | <input type="checkbox"/> |

| <b>F4. Unterstützungsbedarf am Arbeitsplatz</b><br><i>(Kreuzen Sie nur das Kästchen für die Antwort an, die am ehesten auf Sie zutrifft.)</i> |                                                                                                                                                                                                          | Keine Unterstützung      | Etwas Unterstützung      | Viel Unterstützung       | Sehr viel Unterstützung  |
|-----------------------------------------------------------------------------------------------------------------------------------------------|----------------------------------------------------------------------------------------------------------------------------------------------------------------------------------------------------------|--------------------------|--------------------------|--------------------------|--------------------------|
| 1.                                                                                                                                            | Beim Erkennen geltender sozialer Regeln                                                                                                                                                                  | <input type="checkbox"/> | <input type="checkbox"/> | <input type="checkbox"/> | <input type="checkbox"/> |
| 2.                                                                                                                                            | Bei der Einhaltung geltender sozialer Regeln                                                                                                                                                             | <input type="checkbox"/> | <input type="checkbox"/> | <input type="checkbox"/> | <input type="checkbox"/> |
| 3.                                                                                                                                            | Bei der Einschätzung, wie intensiv eine Aufgabe erledigt werden sollte                                                                                                                                   | <input type="checkbox"/> | <input type="checkbox"/> | <input type="checkbox"/> | <input type="checkbox"/> |
| 4.                                                                                                                                            | Bei der Priorisierung von Aufgaben, z.B. durch Erstellung von Tages- und Wochenplänen                                                                                                                    | <input type="checkbox"/> | <input type="checkbox"/> | <input type="checkbox"/> | <input type="checkbox"/> |
| 5.                                                                                                                                            | Beim Erkennen von frühen Anzeichen von abwertendem Verhalten durch Kolleginnen / Kollegen (Mobbing)                                                                                                      | <input type="checkbox"/> | <input type="checkbox"/> | <input type="checkbox"/> | <input type="checkbox"/> |
| 6.                                                                                                                                            | Bei der Gestaltung von Kontakten, z.B. Kundenkontakten                                                                                                                                                   | <input type="checkbox"/> | <input type="checkbox"/> | <input type="checkbox"/> | <input type="checkbox"/> |
| 7.                                                                                                                                            | Bei der Organisation von externen Hilfsangeboten, falls Unsicherheiten bei der Arbeit auftreten, z.B. durch Job Coach, Selbsthilfegruppe, Autismus-Verein oder eine/n Autismustherapeutin / -therapeuten | <input type="checkbox"/> | <input type="checkbox"/> | <input type="checkbox"/> | <input type="checkbox"/> |
| 8.                                                                                                                                            | Bei der Äußerung von Unklarheiten bei Aufgabenstellungen                                                                                                                                                 | <input type="checkbox"/> | <input type="checkbox"/> | <input type="checkbox"/> | <input type="checkbox"/> |

| <i>(Kreuzen Sie nur das Kästchen für die Antwort an, die am ehesten auf Sie zutrifft.)</i> |                                                                                                                                                                                                                              | Keine Unterstützung      | Etwas Unterstützung      | Viel Unterstützung       | Sehr viel Unterstützung  |
|--------------------------------------------------------------------------------------------|------------------------------------------------------------------------------------------------------------------------------------------------------------------------------------------------------------------------------|--------------------------|--------------------------|--------------------------|--------------------------|
| 9.                                                                                         | Bei Konflikten innerhalb des Teams                                                                                                                                                                                           | <input type="checkbox"/> | <input type="checkbox"/> | <input type="checkbox"/> | <input type="checkbox"/> |
| 10.                                                                                        | Beim Umgang mit Gefühlen der Überforderung aufgrund von zu erledigenden Aufgaben                                                                                                                                             | <input type="checkbox"/> | <input type="checkbox"/> | <input type="checkbox"/> | <input type="checkbox"/> |
| 11.                                                                                        | Beim Umgang mit Gefühlen der Überforderung aufgrund von sozialen Anforderungen                                                                                                                                               | <input type="checkbox"/> | <input type="checkbox"/> | <input type="checkbox"/> | <input type="checkbox"/> |
| 12.                                                                                        | Beim Umgang mit Misserfolgen durch nicht korrekt gelöste Aufgaben                                                                                                                                                            | <input type="checkbox"/> | <input type="checkbox"/> | <input type="checkbox"/> | <input type="checkbox"/> |
| 13.                                                                                        | Bei der Veranlassung der Einrichtung eines reizarmen Arbeitsplatzes                                                                                                                                                          | <input type="checkbox"/> | <input type="checkbox"/> | <input type="checkbox"/> | <input type="checkbox"/> |
| 14.                                                                                        | Beim Umgang mit Veränderungen am Arbeitsplatz                                                                                                                                                                                | <input type="checkbox"/> | <input type="checkbox"/> | <input type="checkbox"/> | <input type="checkbox"/> |
| 15.                                                                                        | Beim Verfassen von E-Mails, z.B. durch einen Leitfaden                                                                                                                                                                       | <input type="checkbox"/> | <input type="checkbox"/> | <input type="checkbox"/> | <input type="checkbox"/> |
| 16.                                                                                        | Bei der Durchführung von Telefongesprächen, z.B. durch einen Leitfaden oder ein Training von möglichen Gesprächssituationen                                                                                                  | <input type="checkbox"/> | <input type="checkbox"/> | <input type="checkbox"/> | <input type="checkbox"/> |
| 17.                                                                                        | Bei der Einschätzung eigener Kompetenzen und Entscheidungsspielräume                                                                                                                                                         | <input type="checkbox"/> | <input type="checkbox"/> | <input type="checkbox"/> | <input type="checkbox"/> |
| 18.                                                                                        | <p>Sonstiges: Hier ist Platz, um weitere, für Sie wichtige Formen der Unterstützung rund um den Arbeitsplatz einzugeben.</p> <p><i>(Bitte tragen Sie diese stichpunktartig in den Kasten auf der rechten Seite ein.)</i></p> |                          |                          |                          |                          |

## G: Schwierigkeiten aufgrund von Gesundheitsproblemen

Im Folgenden geht es um Schwierigkeiten, die aufgrund von Gesundheitsproblemen entstehen können. Gesundheitsprobleme beinhalten Krankheiten oder Erkrankungen, andere Gesundheitsprobleme, die lang oder kurz andauernd sein können, Verletzungen, mentale oder emotionale Probleme sowie Drogen- oder Alkoholprobleme.

Denken Sie bitte an die letzten 30 Tage zurück und beantworten Sie bitte die folgenden Fragen im Hinblick darauf, **wie viele Schwierigkeiten** Sie bei der Durchführung der nachfolgenden Aktivitäten hatten. Kreuzen Sie bei jeder Frage nur eine Antwort an.

*(Kreuzen Sie bei jeder Frage bitte nur eine Antwort an. Lassen Sie bitte keine Aussage aus und kreuzen Sie im Zweifelsfall die Antwortmöglichkeit an, die noch am ehesten auf Sie zutrifft.)*

(WHODAS-s)

Sehr  
starke/  
nicht  
möglich

Wie viele Schwierigkeiten hatten Sie  
in den letzten 30 Tagen:

Keine

Geringe

Mäßige

Starke

1. Eine längere Zeit (ca. 30 Minuten)  
zu stehen?

(S1)

2. Ihren Haushaltspflichten  
nachzukommen?

(S2)

3. Neue Aufgaben zu lernen  
(z.B. Erlernen an einen neuen Ort  
zu gelangen, den Sie nicht  
kannten)?

(S3)

4. Wie viele Schwierigkeiten hatten  
Sie, an gesellschaftlichen  
Aktivitäten (wie z.B. Festlichkeiten,  
religiöse oder andere Aktivitäten)  
in der gleichen Art und Weise  
teilzunehmen, wie jeder andere?

(S4)

5. Wie sehr wurden Sie durch Ihren  
gesundheitlichen Zustand emotional  
belastet?

(S5)

6. Sich für 10 Minuten auf etwas zu  
konzentrieren?

(S6)

7. Eine längere Strecke (ca. einen  
Kilometer) zu Fuß zu gehen?

(S7)

8. Ihren gesamten Körper zu  
waschen?

(S8)

| Wie viele Schwierigkeiten hatten Sie in den letzten 30 Tagen: |                                                           | Keine                    | Geringe                  | Mäßige                   | Starke                   | Sehr starke/<br>nicht möglich |
|---------------------------------------------------------------|-----------------------------------------------------------|--------------------------|--------------------------|--------------------------|--------------------------|-------------------------------|
| 9.                                                            | Sich anzuziehen?<br>(S9)                                  | <input type="checkbox"/> | <input type="checkbox"/> | <input type="checkbox"/> | <input type="checkbox"/> | <input type="checkbox"/>      |
| 10.                                                           | Im Umgang mit Personen, die Sie nicht kennen?<br>(S10)    | <input type="checkbox"/> | <input type="checkbox"/> | <input type="checkbox"/> | <input type="checkbox"/> | <input type="checkbox"/>      |
| 11.                                                           | Eine Freundschaft aufrechtzuerhalten?<br>(S11)            | <input type="checkbox"/> | <input type="checkbox"/> | <input type="checkbox"/> | <input type="checkbox"/> | <input type="checkbox"/>      |
| 12.                                                           | Bei der Bewältigung Ihres Arbeits-/Schulalltags?<br>(S12) | <input type="checkbox"/> | <input type="checkbox"/> | <input type="checkbox"/> | <input type="checkbox"/> | <input type="checkbox"/>      |

Bei den nächsten drei Antworten wird kein Kästchen angekreuzt, sondern auf dem Strich die **Anzahl der Tage** angegeben.

13. An wie vielen Tagen traten diese Schwierigkeiten während der letzten 30 Tage auf?  
(H1) Anzahl der Tage: \_\_\_\_\_
14. An wie vielen Tagen in den letzten 30 Tagen waren Sie aufgrund Ihrer Gesundheitsprobleme absolut unfähig, alltägliche Aktivitäten oder Ihre Arbeit zu verrichten?  
(H2) Anzahl der Tage: \_\_\_\_\_
15. An wie vielen Tagen in den letzten 30 Tagen mussten Sie aufgrund Ihrer Gesundheitsprobleme alltägliche Aktivitäten oder Ihre Arbeit reduzieren?  
(H3) Anzahl der Tage: \_\_\_\_\_

## H: Verschiedene Aspekte von Sprache

Im Folgenden finden Sie einige Aussagen über **verschiedene Aspekte von Sprache**. Bitte lesen Sie sich die Aussagen durch und entscheiden Sie, inwieweit die jeweilige Aussage auf Sie zutrifft.

In manchen Sätzen wird auch der Begriff „**Metapher**“ benutzt. Eine Metapher ordnet einer Sache einen anderen Namen als üblich zu, um gedanklich ein bestimmtes Bild zu erzeugen, welches Ähnlichkeit mit der Sache hat (z.B. werden die Äste und Blätter eines Baumes wegen ihrer äußeren Form auch als Baumkrone bezeichnet).

*(Kreuzen Sie bei jeder Frage bitte nur eine Antwort an. Lassen Sie bitte keine Aussage aus und kreuzen Sie im Zweifelsfall die Antwortmöglichkeit an, die noch am ehesten auf Sie zutrifft.)*

(FQLP)

|                                                                                                                                               | Ich stimme zu.           | Ich stimme eher zu.      | Ich stimme eher nicht zu. | Ich stimme nicht zu.     |
|-----------------------------------------------------------------------------------------------------------------------------------------------|--------------------------|--------------------------|---------------------------|--------------------------|
| 1. Mein Sprachverständnis unterscheidet sich von dem anderer Menschen.                                                                        | <input type="checkbox"/> | <input type="checkbox"/> | <input type="checkbox"/>  | <input type="checkbox"/> |
| 2. Ich verstehe oft nicht, was andere mir sagen wollen.                                                                                       | <input type="checkbox"/> | <input type="checkbox"/> | <input type="checkbox"/>  | <input type="checkbox"/> |
| 3. Im Gespräch finde ich Metaphern und / oder Sprichwörter irritierend.                                                                       | <input type="checkbox"/> | <input type="checkbox"/> | <input type="checkbox"/>  | <input type="checkbox"/> |
| 4. Mir nicht bekannte Metaphern und / oder Sprichwörter erschließen sich mir intuitiv.                                                        | <input type="checkbox"/> | <input type="checkbox"/> | <input type="checkbox"/>  | <input type="checkbox"/> |
| 5. Metaphern und / oder Sprichwörter halte ich für unnötig.                                                                                   | <input type="checkbox"/> | <input type="checkbox"/> | <input type="checkbox"/>  | <input type="checkbox"/> |
| 6. Ich erkenne nicht-wörtlich gemeinte Ausdrücke daran, dass ich sie in der Vergangenheit schon einmal gehört und damals missverstanden habe. | <input type="checkbox"/> | <input type="checkbox"/> | <input type="checkbox"/>  | <input type="checkbox"/> |
| 7. Ironie erkenne ich meistens ohne Probleme.                                                                                                 | <input type="checkbox"/> | <input type="checkbox"/> | <input type="checkbox"/>  | <input type="checkbox"/> |
| 8. In der Schulzeit habe ich Aussagen meiner Lehrer und Mitschüler häufig missverstanden.                                                     | <input type="checkbox"/> | <input type="checkbox"/> | <input type="checkbox"/>  | <input type="checkbox"/> |
| 9. Ich habe bewusst daran gearbeitet, Metaphern / Sprichwörter besser zu verstehen.                                                           | <input type="checkbox"/> | <input type="checkbox"/> | <input type="checkbox"/>  | <input type="checkbox"/> |
| 10. Ich erschließe mir die Bedeutungen von Metaphern etc. durch rationales Analysieren.                                                       | <input type="checkbox"/> | <input type="checkbox"/> | <input type="checkbox"/>  | <input type="checkbox"/> |
| 11. In einer idealen Sprache gibt es keine Zwei- oder Mehrdeutigkeiten.                                                                       | <input type="checkbox"/> | <input type="checkbox"/> | <input type="checkbox"/>  | <input type="checkbox"/> |

### I: Angaben zur Person

Abschließend möchten wir Sie bitten, einige **Informationen zu Ihrer Person** anzugeben. Ihre persönlichen Daten werden nur in Gruppen ausgewertet dargestellt, so dass keine Rückschlüsse auf Ihre Person möglich sind.

11. Wie alt sind Sie?

(Bitte runden Sie Ihr Alter auf volle Jahre auf oder ab.)

\_\_\_\_\_ Jahre

12. Welches Geschlecht haben Sie?

(DEGS D-2)

Weiblich

Männlich

13. Welchen Familienstand haben Sie?

Mit „verheiratet“ sind auch eingetragene Lebenspartnerschaften gemeint.

(DEGS D-119)

Verheiratet, mit Ehepartnerin / Ehepartner zusammen lebend

Geschieden

Verheiratet, von Ehepartnerin / vom Ehepartner getrennt lebend

Verwitwet

Ledig

14. Haben Sie eine/n feste/n Partnerin / Partner, mit der / dem Sie mindestens sechs Monate zusammen sind?

(DEGS D120)

Ja

Nein

15. Haben Sie eine oder mehrere der folgenden lang andauernden, chronischen Krankheiten? Chronische Krankheiten sind lang andauernde Erkrankungen, die ständiger Behandlung und Kontrolle bedürfen, z.B. Diabetes, Herzerkrankungen oder Zwangserkrankungen.

(Hier können mehrere Antworten angekreuzt werden.)

(angelehnt an DEGS D-4)

Nein ➤ **Bitte weiter mit Frage I6**

Ja, und zwar:

Depressive Störung

Zwangserkrankung

Orthopädische Problematik  
(z.B. chronischer Rückenschmerz)

Herzerkrankung

Atemwegserkrankungen

Diabetes

Sonstiges:

(Bitte nutzen Sie für Ihre Antwort den Kasten.)

16. Welche Form der Autismus-Spektrum-Störung ist bei Ihnen diagnostiziert worden?

*(Kreuzen Sie nur das Kästchen für die Antwort an, die am ehesten auf Sie zutrifft.)*

- |                                                          |                                                                                             |
|----------------------------------------------------------|---------------------------------------------------------------------------------------------|
| <input type="checkbox"/> Frühkindlicher Autismus (F84.0) | <input type="checkbox"/> Tief greifende Entwicklungsstörung, nicht näher bezeichnet (F84.9) |
| <input type="checkbox"/> Atypischer Autismus (F84.1)     | <input type="checkbox"/> Ich kenne meine Diagnose nicht.                                    |
| <input type="checkbox"/> Asperger Autismus (F84.5)       |                                                                                             |

17. Mit wie vielen Jahren ist bei Ihnen die Autismus-Spektrum-Störung erstmalig durch einen Arzt diagnostiziert worden?

Mit \_\_\_\_\_ Jahren

J1. Wurde der Fragebogen selbständig ausgefüllt?

- |                             |                                                  |
|-----------------------------|--------------------------------------------------|
| <input type="checkbox"/> Ja | <input type="checkbox"/> Nein. Mir hat geholfen: |
|-----------------------------|--------------------------------------------------|

*(Bitte tragen Sie Ihre Antwort in den Kasten ein und geben die Funktion der helfenden Person an, z.B. „Familienangehörige/r“.)*

**K: Anmerkungen und Vorschläge**

Haben Sie **Anmerkungen oder Vorschläge** zu unserer Studie oder diesem Fragebogen?  
Hier ist Platz dafür.

**Vielen Dank für Ihre Mitarbeit und die Unterstützung unserer Studie!**
